# Supplementary material for: Intraoral Scanners for In Vivo 3D Imaging of the Gingiva and the Alveolar Process
Source: MDPI journal article supplement (doi:10.3390/jcm11216389), 2022-10-28
Supplement: s1 [file s1]

# Intraoral scanners for in vivo 3D imaging of the gingiva and the alveolar process

Jonas Winkler , Anton Sculean and Nikolaos Gkantidis

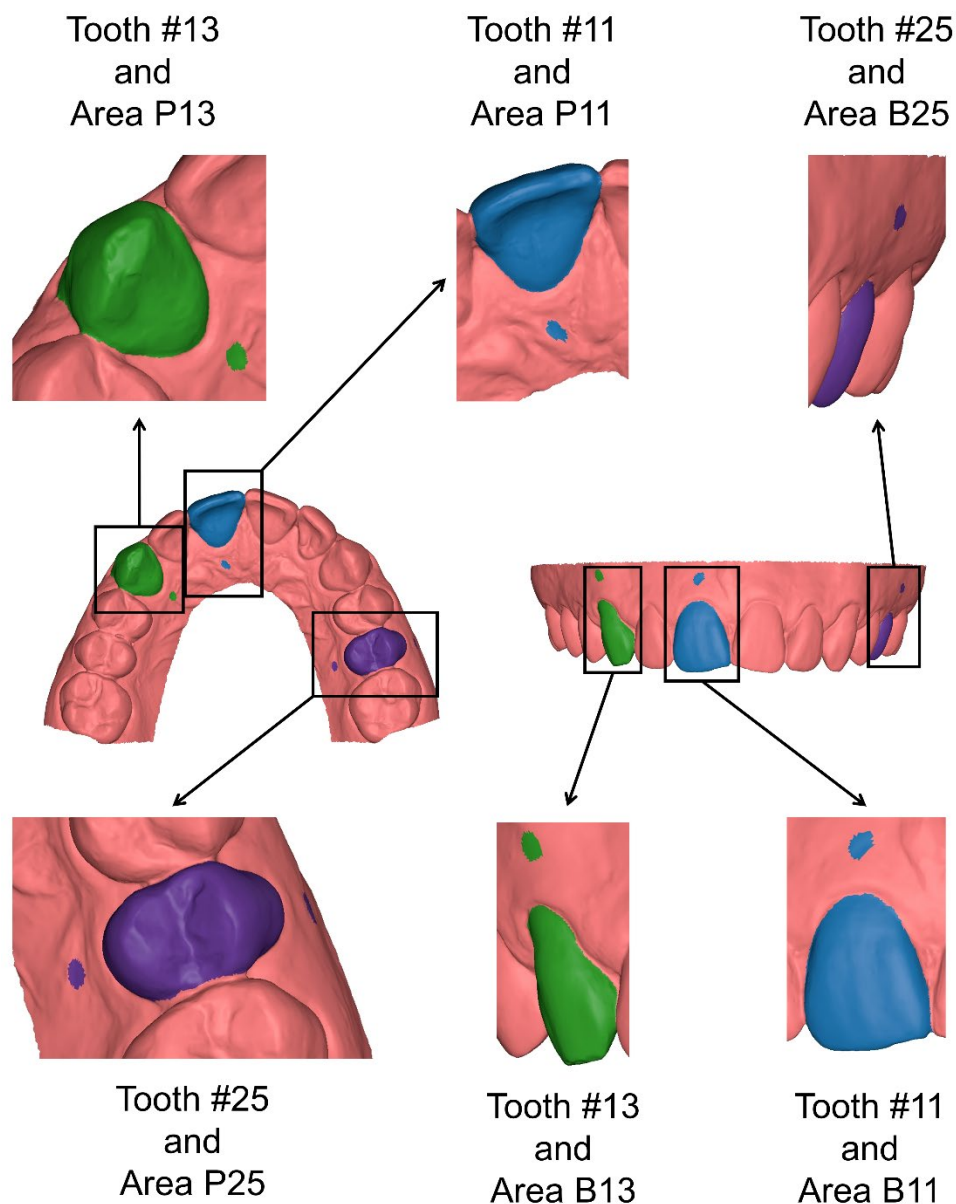

**Figure S1.** Superimposition areas and regions of interest (ROI) for single tooth measurements. Superimposition areas: clinical crown of tooth #11 (blue), #13 (green) and #25 (violet). ROIs: circular areas of approximately 2 mm diameter, centered 2 mm apically to the deepest point of the gingival margins of teeth #11, #13 and #25, on the buccal (B11, B13, B25) and palatal side (P11, P13, P25).

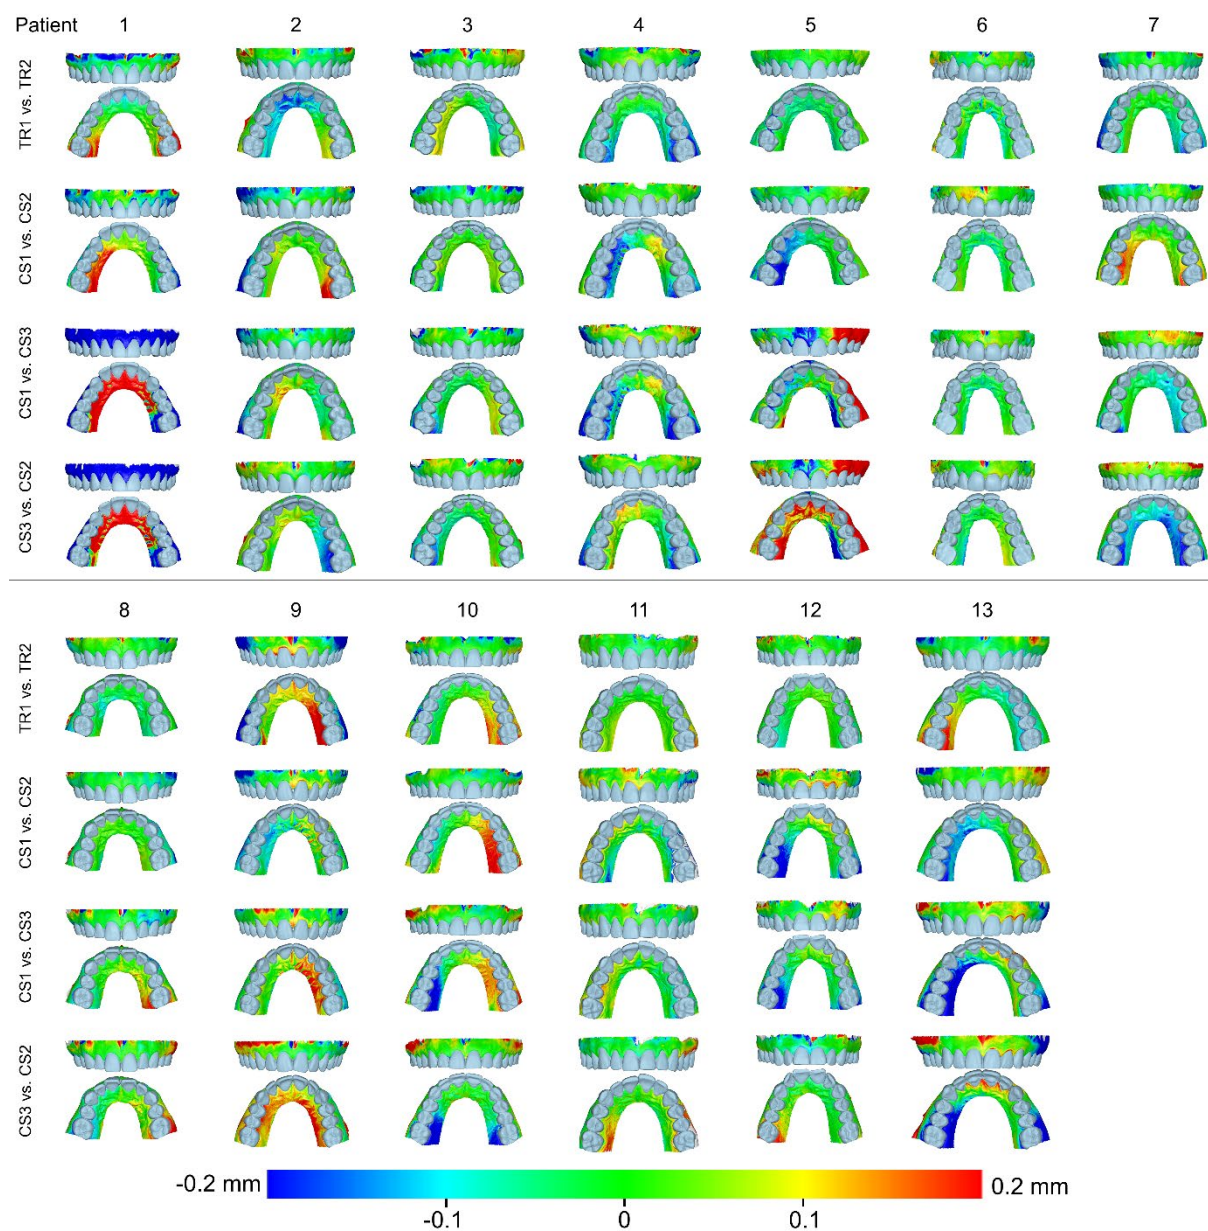

**Figure S2.** Colour-coded distance maps showing the precision of the intraoral scans at the buccal and palatal alveolar soft-tissue surfaces when superimposed on the buccal surfaces of the front teeth. Three scans from CS 3600 (CS1, CS2, CS3) and two scans from TRIOS3 (TR1, TR2) were assessed.

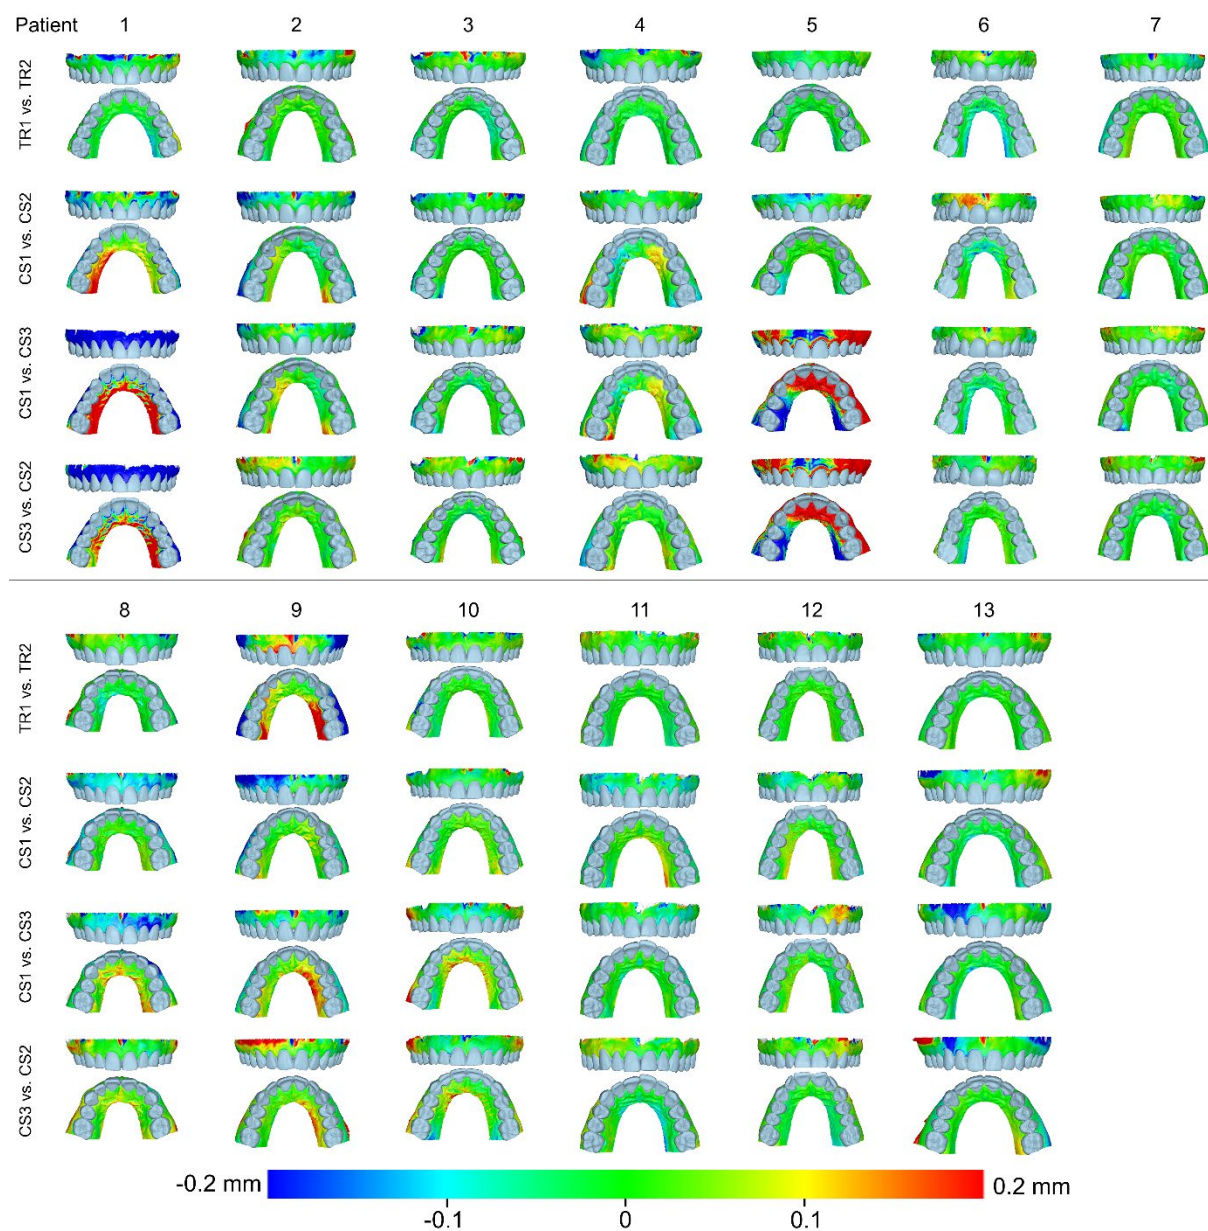

**Figure S3.** Colour-coded distance maps showing the precision of the intraoral scans at the buccal and palatal alveolar soft-tissue surfaces when superimposed on the dental arch. Three scans from CS 3600 (CS1, CS2, CS3) and two scans from TRIOS3 (TR1, TR2) were assessed.

**Table S1.** Pairwise comparisons of the precision of scanners in the imaging of the alveolar process detected through repeated scan superimpositions on different areas.

| Superimposition area | Region of interest | P-value <sup>1</sup> |                      | CS1vsCS3 -<br>CS1vsCS2 | CS2vsCS3 -<br>CS1vsCS2 | TR1vsTR2 -<br>CS1vsCS2 | CS2vsCS3 -<br>CS1vsCS3 | TR1vsTR2 -<br>CS1vsCS3 | TR1vsTR2 -<br>CS2vsCS3 |
|----------------------|--------------------|----------------------|----------------------|------------------------|------------------------|------------------------|------------------------|------------------------|------------------------|
| Alveolar process     | Alveolar process   | 0.006                | P-value <sup>2</sup> | 0.507                  | 0.075                  | 0.064                  | 0.221                  | 0.039                  | 0.019                  |
| Buccal front teeth   | Alveolar process   | 0.109                | P-value <sup>2</sup> | 0.279                  | 0.133                  | 0.133                  | 0.173                  | 0.064                  | 0.055                  |
| Dental arch          | Alveolar process   | 0.016                | P-value <sup>2</sup> | 0.249                  | 0.279                  | 0.046                  | 0.650                  | 0.028                  | 0.039                  |

<sup>1</sup>Friedmann test, Level of significance:  $p < 0.05$ <sup>2</sup>Wilcoxon signed-rank test (2-tailed), Level of significance following Bonferroni correction:  $p < 0.01$ **Table S2.** Pairwise comparisons of the precision of scanners in the imaging of specific alveolar areas after superimposition on single teeth.

| Superimposition area | Region of interest* | P-value <sup>1</sup> |                      | B11_CS1vsCS3 -<br>B11_CS1vsCS2 | B11_CS2vsCS3 -<br>B11_CS1vsCS2 | B11_TR1vsTR2 -<br>B11_CS1vsCS2 | B11_CS2vsCS3 -<br>B11_CS1vsCS3 | B11_TR1vsTR2 -<br>B11_CS1vsCS3 | B11_TR1vsTR2 -<br>B11_CS2vsCS3 |
|----------------------|---------------------|----------------------|----------------------|--------------------------------|--------------------------------|--------------------------------|--------------------------------|--------------------------------|--------------------------------|
| #11                  | B11                 | 0.048                | P-value <sup>2</sup> | 0.064                          | 0.382                          | 0.152                          | 0.116                          | 0.019                          | 0.087                          |
|                      | P11                 | 0.114                | P-value <sup>2</sup> | -                              | -                              | -                              | -                              | -                              | -                              |
| #13                  | B13                 | 0.378                | P-value <sup>2</sup> | -                              | -                              | -                              | -                              | -                              | -                              |
|                      | P13                 | 0.809                | P-value <sup>2</sup> | -                              | -                              | -                              | -                              | -                              | -                              |
| #25                  | B25                 | 0.595                | P-value <sup>2</sup> | -                              | -                              | -                              | -                              | -                              | -                              |
|                      | P25                 | 0.291                | P-value <sup>2</sup> | -                              | -                              | -                              | -                              | -                              | -                              |

\*Circular areas of approximately 2 mm diameter, centered 2 mm apically to the deepest point of the gingival margin of teeth #11, #13 and #25, on the buccal (B11, B13, B25) and palatal side (P11, P13, P25).

<sup>1</sup>Friedmann test, Level of significance:  $p < 0.05$ <sup>2</sup>Wilcoxon signed-rank test (2-tailed), Level of significance following Bonferroni correction:  $p < 0.01$
